# Supplementary material for: Hyperthyroidism or hypothyroidism and gastrointestinal cancer risk: a Danish nationwide cohort study
Source: PubMed Central journal article supplement (PMC6215792; doi:10.1530/ec-18-0258), 2018-08-31
Supplement: ec-7-1129-t001.pdf [file ec-7-1129-t001.pdf]

## **ELECTRONIC SUPPLEMENTARY MATERIAL**

**Manuscript title:** Hyper- and Hypothyroidism and Gastrointestinal Cancer Risk: A Danish nationwide cohort study

**Journal:** European Journal of Endocrinology

**Authors:** Jakob Kirkegård<sup>1,2</sup>, Dora Körmendiné Farkas<sup>1</sup>, Jens Otto Lunde Jørgensen<sup>3</sup>,  
Deirdre P. Cronin-Fenton<sup>1</sup>

<sup>1</sup> Department of Clinical Epidemiology, Aarhus University Hospital, Olof Palmes Allé 43-45, 8200 Aarhus N, Denmark

<sup>2</sup> Department of Surgery (section for upper gastrointestinal and hepatico-pancreatico-biliary surgery), Aarhus University Hospital, Nørrebrogade 44, 8000 Aarhus C, Denmark

<sup>3</sup> Department of Endocrinology, Nørrebrogade 44, 8000 Aarhus C, Aarhus University Hospital, Denmark

**Corresponding author address:**

Jakob Kirkegård, Department of Surgery, Aarhus University Hospital, Palle Juul-Jensens Boulevard 99, DK-8200 Aarhus N, Denmark

Phone: +45 87 46 00 00 / E-mail: jakob.kirkegaard@auh.rm.dk

**Supplementary Table 1. International Classification of Diseases (ICD)-8 and -10 codes.**

---

**Hyperthyroid disease**

|                       |                                                    |
|-----------------------|----------------------------------------------------|
| Graves' disease       | ICD-8: 242.0; ICD-10: DE05.0                       |
| Struma nodosa toxica  | ICD-8: 242.1, 242.2, 242.3; ICD-10: DE05.1, DE05.2 |
| Other hyperthyroidism | ICD-8: 242.4-242.9; ICD-10: DE05.3-DE05.9          |

---

**Hypothyroid disease**

|                         |                                           |
|-------------------------|-------------------------------------------|
| Hashimoto's thyroiditis | ICD-8: 245.2; ICD-10: DE06.3              |
| Other hypothyroidism    | ICD-8: 244; ICD-10: DE03.2-DE03.9; DE89.0 |

---

**Cancer diagnoses**

|                               |                                     |
|-------------------------------|-------------------------------------|
| Esophagus                     | ICD-8: 150; ICD-10: C15             |
| Stomach                       | ICD-8: 151; ICD-10: C16             |
| Small intestine               | ICD-8: 152; ICD-10: C17             |
| Colon                         | ICD-8: 153, 154.0; ICD-10: C18, C19 |
| Rectum                        | ICD-8: 154.1; ICD-10: C20           |
| Anal canal                    | ICD-8: 154.2 ICD-10: C21            |
| Liver                         | ICD-8: 155; ICD-10: C22             |
| Gallbladder and biliary tract | ICD-8: 156; ICD-10: C23, C24        |
| Pancreas                      | ICD-8: 157; ICD-10: C25             |

---

**Charlson Comorbidity Index**

*Score 1*

|                             |                                                                                            |
|-----------------------------|--------------------------------------------------------------------------------------------|
| Myocardial infarction       | ICD-8: 410; ICD-10: I21, I22, I23                                                          |
| Congestive heart failure    | ICD-8: 427.09, 427.10, 427.11, 427.19, 428.99, 782.49;<br>ICD-10: I50, I11.0, I13.0, I13.2 |
| Peripheral vascular disease | ICD-8: 440, 441, 442, 443, 444, 445; ICD-10: I70, I71, I72,                                |

I73, I74, I77

|                           |                                                                                                                         |
|---------------------------|-------------------------------------------------------------------------------------------------------------------------|
| Cerebrovascular disease   | ICD-8: 430-438; ICD-10: I60-I69, G45, G46                                                                               |
| Dementia                  | ICD-8: 290.09-290.19, 293.09; ICD-10: F00-F03, F05.1, G30                                                               |
| Chronic pulmonary disease | ICD-8: 490-493, 515-518, ICD-10: J40-J47, J60-J67, J68.4, J70.1, J70.3, J84.1, J92.0, J96.1, J98.2, J98.3               |
| Connective tissue disease | ICD-8: 712, 716, 734, 446, 135.99; ICD-10: M05, M06, M08, M09, M30, M31, M32, M33, M34, M35, M36, D86                   |
| Ulcer disease             | ICD-8: 530.91, 530.98, 531-534; ICD-10: K22.1, K25-K28                                                                  |
| Mild liver disease        | ICD-8: 571, 573.01, 573.04; ICD-10: B18, K70.0-K70.3, K70.9, K71, K73, K74, K76.0                                       |
| Diabetes types 1 and 2    | ICD-8: 249.00, 249.06, 249.07, 249.09, 250.00, 250.06, 250.07, 250.09; ICD-10: E10.0, E10.1, E10.9, E11.0, E11.1, E11.9 |

*Score 2*

|                                  |                                                                                                                          |
|----------------------------------|--------------------------------------------------------------------------------------------------------------------------|
| Hemiplegia                       | ICD-8: 344; ICD-10: G81, G82                                                                                             |
| Moderate to severe renal disease | ICD-8: 403, 404, 580-583, 584, 590.09, 593.19, 753.10-753.19, 792; ICD-10: 12, I13, N00-N05, N07, N11, N14, N17-N19, Q61 |
| Diabetes with end-organ damage   | ICD-8: 249.01-249.05, 249.08, 250.01-250.05, 250.08; ICD-10: E10.2-E10.8, E11.2-E11.8                                    |
| Any tumor                        | ICD-8: 140-194, 173.09-173.49, 173.60-173.61, 173.69-99; ICD-10: C00-C75                                                 |
| Leukemia                         | ICD-8: 204-207; ICD-10: C91-C95                                                                                          |
| Lymphoma                         | ICD-8: 200-203, 275.59; ICD-10: C81-C85, C88, C90, C96                                                                   |

*Score 3*

|                                  |                                                                                                           |
|----------------------------------|-----------------------------------------------------------------------------------------------------------|
| Moderate to severe liver disease | ICD-8: 070.00, 070.02, 070.04, 070.06, 070.08, 573.00, 456.00-456.09; ICD-10: B15.0, B16.0, B16.2, B19.0, |
|----------------------------------|-----------------------------------------------------------------------------------------------------------|

K70.4, K72, K76.6, I85

*Score 6*

Metastatic solid tumor ICD-8: 195-198, 199; ICD-10: C76-C80

AIDS ICD-8: 079.83; ICD-10: B21-B24

---

**Comorbid conditions**

Alcoholism ICD-8: 291, 303; ICD10: F10

Inflammatory bowel disease ICD-8: 563; ICD-10: K50, K51, M07.4, M07.5

Mb. Chron ICD-8: 563.00-563.99, ICD-10: K50, M074

Colitis ulcerosa ICD-8: 563.19; ICD-10: K51, M07.5

Diabetes ICD-8: 249, 250; ICD-10: E10-E14

HIV ICD-8: 079.83; ICD-10: B20-B24, F024

Obesity ICD-8: 277.99; ICD-10: E65-E66

Gastrointestinal bleeding ICD-8: 569.15; ICD-10: K62.5

Pancreatitis ICD-8: 577.0, 577.1; ICD-10: K85, K86.0, K86.1

Other autoimmune conditions See below

Chronic obstructive pulmonary disease ICD-8: 490-493, 515-518; ICD-10: J40-J47, J60-J67, J68.4, J70.1, J70.3, J84.1, J92.0, J96.1, J98.2, J98.3

---

**Procedure codes**

Colonoscopy 91070, 91071, 91075, 91080, 91081, 91085, 91090, 91091, 91095, 93200, 93210

KUJF3, KUJF4, KUJG

---

**Other autoimmune conditions**

Autoimmune hemolytic anemia ICD-8: 283.90, 283.91; ICD-10: D59.0, D59.1

Idiopathic thrombocytopenic ICD-8: 287.10; ICD-10: D69.3

purpura

|                                |                                                                               |
|--------------------------------|-------------------------------------------------------------------------------|
| Grave's disease                | ICD-8: 242.00, 242.01, 242.08, 242.09; ICD-10: E05.0                          |
| Autoimmune thyroiditis         | ICD-8: 244.01, 245.03; ICD-10: E06.3                                          |
| Addison's disease              | ICD-8: 255.10, 255.11; ICD-10: E27.1A, E27.2A                                 |
| Diabetes I                     | ICD-8: 249; ICD-10: E10                                                       |
| Multiple sclerosis             | ICD-8: 340; ICD-10: G35                                                       |
| Myasthenia gravis              | ICD-8: 733.09; ICD-10: G70.0                                                  |
| Pernicious anemia              | ICD-8: 281.00, 281.01, 281.08, 281.09; ICD-10: D51.0                          |
| Coeliac disease                | ICD-8: 269.00; ICD-10: K90.0                                                  |
| Crohn's disease                | ICD-8: 563.01, 563.02, 563.09; ICD-10: K50, M07.4                             |
| Ulcerative colitis             | ICD-8: 563.19; ICD-10: K51, M07.5                                             |
| Primary biliary cirrhosis      | ICD-8: 571.90; ICD-10: K74.3                                                  |
| Pemphigus / pemphigoid         | ICD-8: 694.00-694.03, 694.05; ICD-10: L10.0, L10.2, L10.4, L12.0              |
| Dermatitis herpetiformis       | ICD-8: 693.08, 693.09; ICD-10: L13.0                                          |
| Psoriasis                      | ICD-8: 696.09, 696.10, 696.19; ICD-10: L40, M07.0-M07.3                       |
| Vitiligo                       | ICD-8: 709.01; ICD-10: L80                                                    |
| Scleroderma                    | ICD-8: 734.0; ICD-10: M34                                                     |
| Juvenile rheumatoid arthritis  | ICD-8: 734.0; ICD-10: M05, M06, M08, G73.7D                                   |
| Rheumatoid arthritis           | ICD-8: 712.19, 712.29, 712.39, 712.59; ICD-10: I32.8A, I39.8E, I41.8A, I52.8A |
| Ankylosing spondylitis         | ICD-8: 712.49; ICD-10: M45                                                    |
| Polymyositis / dermatomyositis | ICD-8: 716.09, 716.19; ICD-10: M33                                            |
| Systemic lupus erythematosus   | ICD-8: 734.19; ICD-10: M32, G73.7C, I39.8C, N08.5A,                           |

N16.4B

Sjögren's syndrome

ICD-8: 734.90; ICD-10: M35, G73.7A, N16.4A

Sarcoidosis

ICD-8: 135.99; ICD-10: D86, G53.2, H22.1A, I41.8B,  
K77.8B, M63.3

Polyarteritis nodosa

ICD-8: 446.09; ICD-10: M30.0

Wegener's granulomatosis

ICD-8: 446.29; ICD-10: M31.3

Temporal arteritis / polymyalgia  
rheumatica

ICD-8: 446.30, 446.31, 446.39; ICD-10: M31.5, M31.6,  
M35.3

---
