# Supplementary material for: Hyperthyroidism or hypothyroidism and gastrointestinal cancer risk: a Danish nationwide cohort study
Source: PubMed Central journal article supplement (PMC6215792; doi:10.1530/ec-18-0258), 2018-08-31
Supplement: ec-7-1129-t002.pdf [file ec-7-1129-t002.pdf]

**Supplementary Table 2. SIRs for gastrointestinal cancers in 38,508 patients with Graves' disease diagnosed in Denmark in the period 1978-2013, stratified by time of follow-up. Numbers in parentheses indicates 95% CIs.**

| Cancer site      | Overall |     |                     | <1 year |    |                      | 1-5 years |     |                     | >5 years |     |                     |
|------------------|---------|-----|---------------------|---------|----|----------------------|-----------|-----|---------------------|----------|-----|---------------------|
|                  | O       | E   | SIR                 | O       | E  | SIR                  | O         | E   | SIR                 | O        | E   | SIR                 |
| Overall          | 926     | 837 | 1.11<br>(1.04-1.18) | 157     | 70 | 2.25<br>(1.91-2.63)  | 239       | 242 | 0.99<br>(0.86-1.12) | 530      | 525 | 1.01<br>(0.93-1.10) |
| Esophagus        | 51      | 39  | 1.29<br>(0.96-1.70) | 8       | 3  | 2.48<br>(1.07-4.88)  | 7         | 11  | 0.62<br>(0.25-1.27) | 36       | 25  | 1.45<br>(1.01-2.00) |
| Stomach          | 69      | 63  | 1.09<br>(0.85-1.38) | 14      | 6  | 2.37<br>(1.30-3.98)  | 21        | 20  | 1.06<br>(0.66-1.63) | 34       | 38  | 0.90<br>(0.62-1.26) |
| Small intestines | 11      | 11  | 1.01<br>(0.50-1.81) | 1       | 1  | 1.20<br>(0.03-6.67)  | 2         | 3   | 0.66<br>(0.08-2.40) | 8        | 7   | 1.14<br>(0.49-2.24) |
| Colon            | 401     | 371 | 1.08<br>(0.98-1.19) | 81      | 31 | 2.65<br>(2.11-3.30)  | 91        | 107 | 0.85<br>(0.69-1.05) | 229      | 234 | 0.98<br>(0.86-1.12) |
| Rectum           | 171     | 161 | 1.06<br>(0.91-1.24) | 16      | 13 | 1.19<br>(0.68-1.93)  | 56        | 47  | 1.20<br>(0.90-1.55) | 99       | 101 | 0.98<br>(0.80-1.20) |
| Anal canal       | 18      | 15  | 1.17<br>(0.70-1.85) | 5       | 1  | 4.40<br>(1.43-10.26) | 6         | 4   | 1.45<br>(0.53-3.16) | 7        | 10  | 0.70<br>(0.28-1.43) |

|                               |     |     |                     |     |    |                     |     |     |                     |     |     |                     |
|-------------------------------|-----|-----|---------------------|-----|----|---------------------|-----|-----|---------------------|-----|-----|---------------------|
| Liver                         | 30  | 31  | 0.96<br>(0.65-1.37) | 6   | 3  | 2.26<br>(0.83-4.93) | 6   | 9   | 0.66<br>(0.24-1.43) | 18  | 19  | 0.93<br>(0.55-1.47) |
| Gallbladder and biliary tract | 40  | 30  | 1.35<br>(0.97-1.84) | 8   | 3  | 3.09<br>(1.33-6.09) | 9   | 9   | 1.02<br>(0.47-1.94) | 23  | 18  | 1.27<br>(0.80-1.90) |
| Pancreas                      | 135 | 115 | 1.17<br>(0.98-1.38) | 18  | 9  | 1.92<br>(1.14-3.03) | 41  | 33  | 1.25<br>(0.89-1.69) | 76  | 73  | 1.04<br>(0.82-1.30) |
| Smoking-related cancers       | 827 | 750 | 1.10<br>(1.03-1.18) | 137 | 62 | 2.19<br>(1.84-2.59) | 216 | 217 | 0.99<br>(0.87-1.14) | 474 | 470 | 1.01<br>(0.92-1.10) |
| Immune-related cancers        | 168 | 150 | 1.12<br>(0.95-1.30) | 34  | 13 | 2.59<br>(1.80-3.62) | 44  | 45  | 0.98<br>(0.71-1.32) | 90  | 93  | 0.97<br>(0.78-1.20) |
| Alcohol-related cancers       | 664 | 614 | 1.08<br>(1.00-1.17) | 112 | 51 | 2.21<br>(1.82-2.66) | 162 | 177 | 0.92<br>(0.78-1.07) | 390 | 386 | 1.01<br>(0.91-1.12) |
| Obesity-related cancers       | 867 | 780 | 1.11<br>(1.04-1.19) | 145 | 65 | 2.23<br>(1.88-2.62) | 225 | 226 | 0.99<br>(0.87-1.13) | 497 | 489 | 1.02<br>(0.93-1.11) |

---

O: observed events; E: expected events; SIR: standardized incidence ratios
