# Supplementary material for: Hyperthyroidism or hypothyroidism and gastrointestinal cancer risk: a Danish nationwide cohort study
Source: PubMed Central journal article supplement (PMC6215792; doi:10.1530/ec-18-0258), 2018-08-31
Supplement: ec-7-1129-t003.pdf [file ec-7-1129-t003.pdf]

**Supplementary Table 3. SIRs for gastrointestinal cancers in 34,703 patients with struma nodosa toxica diagnosed in Denmark in the period 1978-2013, stratified by time of follow-up. Numbers in parentheses indicates 95% CIs.**

| Cancer site      | Overall |       |                     | <1 year |    |                     | 1-5 years |     |                     | >5 years |     |                     |
|------------------|---------|-------|---------------------|---------|----|---------------------|-----------|-----|---------------------|----------|-----|---------------------|
|                  | O       | E     | SIR                 | O       | E  | SIR                 | O         | E   | SIR                 | O        | E   | SIR                 |
| Overall          | 1,257   | 1,084 | 1.16<br>(1.10-1.23) | 194     | 90 | 2.14<br>(1.85-2.47) | 345       | 309 | 1.12<br>(1.00-1.24) | 718      | 684 | 1.05<br>(0.97-1.13) |
| Esophagus        | 47      | 47    | 1.00<br>(0.73-1.33) | 10      | 4  | 2.68<br>(1.28-4.92) | 12        | 13  | 0.92<br>(0.48-1.61) | 25       | 30  | 0.82<br>(0.53-1.22) |
| Stomach          | 111     | 88    | 1.27<br>(1.04-1.53) | 18      | 9  | 2.10<br>(1.24-3.32) | 29        | 28  | 1.04<br>(0.70-1.50) | 64       | 51  | 1.25<br>(0.96-1.60) |
| Small intestines | 15      | 13    | 1.17<br>(0.65-1.93) | 2       | 1  | 1.93<br>(0.23-6.95) | 6         | 4   | 1.68<br>(0.62-3.67) | 7        | 8   | 0.85<br>(0.34-1.75) |
| Colon            | 536     | 486   | 1.10<br>(1.01-1.20) | 75      | 39 | 1.91<br>(1.51-2.40) | 151       | 135 | 1.11<br>(0.94-1.30) | 310      | 311 | 1.00<br>(0.89-1.11) |
| Rectum           | 227     | 204   | 1.11<br>(0.97-1.27) | 35      | 17 | 2.03<br>(1.41-2.82) | 61        | 58  | 1.04<br>(0.80-1.34) | 131      | 128 | 1.02<br>(0.85-1.21) |
| Anal canal       | 18      | 17    | 1.09<br>(0.64-1.72) | 2       | 1  | 1.58<br>(0.19-5.69) | 3         | 4   | 0.67<br>(0.14-1.96) | 13       | 11  | 1.20<br>(0.64-2.05) |

|                               |       |       |                     |     |    |                     |     |     |                     |     |     |                     |
|-------------------------------|-------|-------|---------------------|-----|----|---------------------|-----|-----|---------------------|-----|-----|---------------------|
| Liver                         | 43    | 40    | 1.08<br>(0.78-1.45) | 8   | 3  | 2.33<br>(1.00-4.59) | 8   | 12  | 0.69<br>(0.30-1.36) | 27  | 25  | 1.08<br>(0.71-1.58) |
| Gallbladder and biliary tract | 46    | 42    | 1.11<br>(0.81-1.48) | 7   | 4  | 1.84<br>(0.74-3.80) | 16  | 13  | 1.27<br>(0.73-2.07) | 23  | 25  | 0.91<br>(0.58-1.37) |
| Pancreas                      | 214   | 148   | 1.44<br>(1.26-1.65) | 37  | 12 | 3.04<br>(2.14-4.19) | 59  | 42  | 1.42<br>(1.08-1.83) | 118 | 94  | 1.25<br>(1.03-1.50) |
| Smoking-related cancers       | 1,135 | 973   | 1.17<br>(1.10-1.24) | 175 | 81 | 2.16<br>(1.85-2.51) | 312 | 277 | 1.13<br>(1.01-1.26) | 648 | 615 | 1.05<br>(0.97-1.14) |
| Immune-related cancers        | 233   | 198   | 1.17<br>(1.03-1.33) | 37  | 18 | 2.04<br>(1.44-2.82) | 62  | 60  | 1.03<br>(0.79-1.33) | 134 | 120 | 1.11<br>(0.93-1.32) |
| Alcohol-related cancers       | 868   | 790   | 1.10<br>(1.03-1.17) | 130 | 65 | 2.02<br>(1.68-2.39) | 238 | 223 | 1.07<br>(0.94-1.21) | 500 | 503 | 0.99<br>(0.91-1.09) |
| Obesity-related cancers       | 1,181 | 1,014 | 1.16<br>(1.10-1.23) | 182 | 85 | 2.15<br>(1.85-2.48) | 328 | 289 | 1.13<br>(1.01-1.26) | 671 | 640 | 1.05<br>(0.97-1.13) |

---

O: observed events; E: expected events; SIR: standardized incidence ratios
