# Supplementary material for: Hyperthyroidism or hypothyroidism and gastrointestinal cancer risk: a Danish nationwide cohort study
Source: PubMed Central journal article supplement (PMC6215792; doi:10.1530/ec-18-0258), 2018-08-31
Supplement: ec-7-1129-t004.pdf [file ec-7-1129-t004.pdf]

**Supplementary Table 4. SIRs for gastrointestinal cancers in 19,572 patients with other hyperthyroid disease diagnosed in Denmark in the period 1978-2013, stratified by time of follow-up. Numbers in parentheses indicates 95% CIs.**

| Cancer site      | Overall |     |                      | <1 year |    |                      | 1-5 years |     |                     | >5 years |     |                     |
|------------------|---------|-----|----------------------|---------|----|----------------------|-----------|-----|---------------------|----------|-----|---------------------|
|                  | O       | E   | SIR                  | O       | E  | SIR                  | O         | E   | SIR                 | O        | E   | SIR                 |
| Overall          | 445     | 325 | 1.367<br>(1.25-1.50) | 129     | 48 | 2.69<br>(2.24-3.19)  | 142       | 136 | 1.05<br>(0.88-1.23) | 174      | 141 | 1.23<br>(1.06-1.43) |
| Esophagus        | 19      | 16  | 1.18<br>(0.71-1.84)  | 7       | 2  | 2.91<br>(1.17-5.99)  | 5         | 7   | 0.74<br>(0.24-1.71) | 7        | 7   | 1.02<br>(0.41-2.09) |
| Stomach          | 35      | 23  | 1.56<br>(1.08-2.16)  | 13      | 4  | 3.70<br>(1.97-6.33)  | 12        | 10  | 1.24<br>(0.64-2.17) | 10       | 9   | 1.08<br>(0.51-1.98) |
| Small intestines | 3       | 4   | 0.73<br>(0.15-2.12)  | 2       | 1  | 3.46<br>(0.42-12.51) | 1         | 2   | 0.60<br>(0.02-3.35) | 0        | 2   | 0.00<br>(-)         |
| Colon            | 185     | 147 | 1.26<br>(1.08-1.45)  | 47      | 22 | 2.17<br>(1.59-2.89)  | 61        | 61  | 0.99<br>(0.76-1.27) | 77       | 64  | 1.20<br>(0.95-1.50) |
| Rectum           | 86      | 62  | 1.39<br>(1.11-1.72)  | 22      | 9  | 2.40<br>(1.50-3.63)  | 30        | 26  | 1.16<br>(0.78-1.65) | 34       | 27  | 1.27<br>(0.88-1.78) |
| Anal canal       | 8       | 5   | 1.49<br>(0.64-2.94)  | 4       | 1  | 5.42<br>(1.47-13.87) | 0         | 2   | 0.00<br>(-)         | 4        | 2   | 1.61<br>(0.44-4.13) |
| Liver            | 17      | 12  | 1.39<br>(1.11-1.72)  | 4       | 2  | 2.17<br>(0.59-5.55)  | 4         | 5   | 0.78<br>(0.21-1.99) | 9        | 5   | 1.72<br>(0.79-3.27) |

|                               |     |     |                     |     |    |                     |     |     |                     |     |     |                     |
|-------------------------------|-----|-----|---------------------|-----|----|---------------------|-----|-----|---------------------|-----|-----|---------------------|
| Gallbladder and biliary tract | 16  | 11  | 1.49<br>(0.85-2.42) | 1   | 2  | 0.62<br>(0.02-3.47) | 5   | 5   | 1.11<br>(0.36-2.59) | 10  | 5   | 2.16<br>(1.03-3.97) |
| Pancreas                      | 76  | 45  | 1.70<br>(1.34-2.12) | 29  | 6  | 4.47<br>(2.99-6.42) | 24  | 19  | 1.29<br>(0.83-1.92) | 23  | 20  | 1.16<br>(0.74-1.73) |
| Smoking-related cancers       | 401 | 292 | 1.37<br>(1.24-1.51) | 118 | 43 | 2.73<br>(2.26-3.27) | 132 | 122 | 1.08<br>(0.90-1.28) | 151 | 127 | 1.19<br>(1.01-1.40) |
| Immune-related cancers        | 79  | 55  | 1.44<br>(1.14-1.79) | 24  | 8  | 2.90<br>(1.86-4.31) | 22  | 23  | 0.95<br>(0.60-1.44) | 33  | 24  | 1.40<br>(0.96-1.97) |
| Alcohol-related cancers       | 310 | 241 | 1.28<br>(1.14-1.43) | 82  | 36 | 2.30<br>(1.83-2.85) | 101 | 101 | 1.00<br>(0.81-1.22) | 127 | 105 | 1.21<br>(1.01-1.44) |
| Obesity-related cancers       | 417 | 303 | 1.38<br>(1.25-1.51) | 119 | 45 | 2.65<br>(2.20-3.17) | 137 | 127 | 1.08<br>(0.91-1.28) | 161 | 131 | 1.22<br>(1.04-1.43) |

---

O: observed events; E: expected events; SIR: standardized incidence ratios
